# Supplementary material
Source: PubMed Central journal article supplement (PMC5130350)
Supplement: NIHMS831094-supplement-supplement_1.pdf [file NIHMS831094-supplement-supplement_1.pdf]

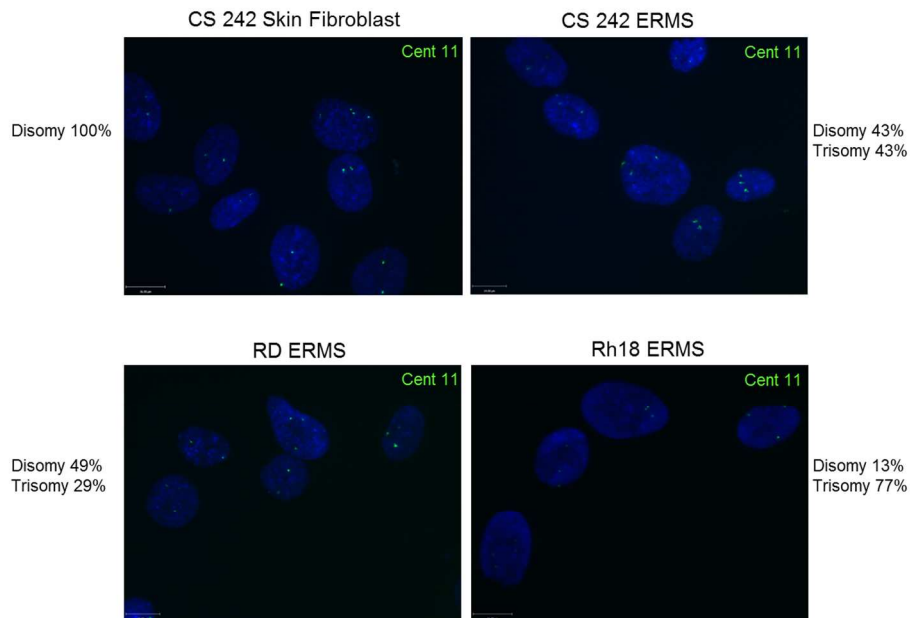

28 **Figure S1. Increased Chromosome 11 Copy Number in Costello Syndrome and Sporadic ERMS.**  
29 Fluorescence *in situ* hybridization (FISH) analysis of chromosome 11 revealed increased copy number changes  
30 in Costello Syndrome (242) and sporadic (RD, Rh18) ERMS. The cells were probed with centromeric 11 (green  
31 signal) and the DAPI counterstain (blue signal).

---

32  
33  
34 238x176mm (150 x 150 DPI)  
35  
36  
37  
38  
39  
40  
41  
42  
43  
44  
45  
46  
47  
48  
49  
50  
51  
52  
53  
54  
55  
56  
57  
58  
59  
60
